# Supplementary material for: Automated evaluation systems to enhance exam quality and reduce test anxiety
Source: PeerJ Comput Sci. 2025 Feb 25;11:e2666. doi: 10.7717/peerj-cs.2666 (PMC11888855; doi:10.7717/peerj-cs.2666)
Supplement: Supplemental Information 3 [file peerj-cs-11-2666-s003.xlsx]

## Sheet: scale data
I_1	I_2	I_3	I_4	I_5	I_6	I_7	I_8	T_1	T_2	T_3	T_4	T_5	T_6	T_7	F_1	F_2	F_3	F_4	total_degree
5	4	5	4	5	5	5	5	5	4	4	5	5	5	5	4	4	5	4	88
4	5	4	5	5	4	3	4	5	4	4	5	5	5	5	4	4	5	4	84
4	5	4	5	5	4	5	5	5	4	4	5	5	5	5	4	5	5	5	89
5	4	5	5	5	5	5	5	5	4	4	5	5	5	5	4	5	5	5	91
5	5	5	5	5	5	5	5	5	4	4	5	5	5	5	4	5	4	5	91
5	4	5	4	5	5	5	5	5	4	4	5	5	5	5	4	4	5	4	88
2	3	3	4	3	3	3	2	2	3	3	4	3	3	3	2	2	3	3	54
4	5	4	5	5	4	5	5	5	4	4	5	5	5	5	4	5	5	5	89
5	4	5	5	5	5	5	5	5	4	4	5	5	5	5	4	5	5	5	91
5	5	5	5	5	5	5	5	5	4	4	5	5	5	5	4	5	4	5	91
5	4	5	4	5	5	5	5	5	4	4	5	5	5	5	4	4	5	4	88
4	5	4	5	5	4	3	4	5	4	4	5	5	5	5	4	4	5	4	84
4	5	4	5	5	4	5	5	5	4	4	5	5	5	5	4	5	5	5	89
5	4	5	5	5	5	5	5	5	4	4	5	5	5	5	4	5	5	5	91
5	5	5	5	5	5	5	5	5	4	4	5	5	5	5	4	5	4	5	91
5	4	5	4	5	5	5	5	5	4	4	5	5	5	5	4	4	5	4	88
2	3	3	4	3	3	3	2	2	3	3	2	3	3	3	2	4	2	3	53
4	5	4	5	5	4	5	5	5	4	4	5	5	5	5	4	5	5	5	89
5	4	5	5	5	5	5	5	5	4	4	5	5	5	5	4	5	5	5	91
5	5	5	5	5	5	5	5	5	4	4	5	5	5	5	4	5	4	5	91
5	4	5	4	5	5	5	5	5	4	4	5	5	5	5	4	4	5	4	88
4	5	4	5	5	4	3	4	5	4	4	5	5	5	5	4	4	5	4	84
4	5	4	5	5	4	5	5	5	4	4	5	5	5	5	4	5	5	5	89
5	4	5	5	5	5	5	5	5	4	4	5	5	5	5	4	5	5	5	91
5	5	5	5	5	5	5	5	5	4	4	5	5	5	5	4	5	4	5	91
5	4	5	4	5	5	5	5	5	4	4	5	5	5	5	4	4	5	4	88
4	5	4	5	5	4	3	4	5	4	4	5	5	5	5	4	4	5	4	84
4	5	4	5	5	4	5	5	5	4	4	5	5	5	5	4	5	5	5	89
5	4	5	5	5	5	5	5	5	4	4	5	5	5	5	4	5	5	5	91
5	5	5	5	5	5	5	5	5	4	4	5	5	5	5	4	5	4	5	91
5	4	5	4	5	5	5	5	5	4	4	5	5	5	5	4	4	5	4	88
4	5	4	5	5	4	3	4	5	4	4	5	5	5	5	4	4	5	4	84
4	5	4	5	5	4	5	5	5	4	4	5	5	5	5	4	5	5	5	89
5	4	5	5	5	5	5	5	5	4	4	5	5	5	5	4	5	5	5	91
5	5	5	5	5	5	5	5	5	4	4	5	5	5	5	4	5	4	5	91
4	3	3	4	3	3	3	4	4	3	3	4	3	3	3	4	4	3	3	64
4	5	4	5	5	4	3	4	5	4	4	5	5	5	5	4	4	5	4	84
4	5	4	5	5	4	5	5	5	4	4	5	5	5	5	4	5	5	5	89
5	4	5	5	5	5	5	5	5	4	4	5	5	5	5	4	5	5	5	91
5	5	5	5	5	5	5	5	5	4	4	5	5	5	5	4	5	4	5	91
5	5	5	5	5	5	5	5	5	4	4	5	5	5	5	4	5	4	5	91
5	4	5	4	5	5	5	5	5	4	4	5	5	5	5	4	4	5	4	88
4	5	4	5	5	4	3	4	5	4	4	5	5	5	5	4	4	5	4	84
4	5	4	5	5	4	5	5	5	4	4	5	5	5	5	4	5	5	5	89
5	4	5	5	5	5	5	5	5	4	4	5	5	5	5	4	5	5	5	91
5	5	5	5	5	5	5	5	5	4	4	5	5	5	5	4	5	4	5	91
5	4	5	4	5	5	5	5	5	4	4	5	5	5	5	4	4	5	4	88
2	3	3	2	3	3	3	2	2	3	3	4	3	3	3	4	2	3	3	54
4	5	4	5	5	4	5	5	5	4	4	5	5	5	5	4	5	5	5	89
5	4	5	5	5	5	5	5	5	4	4	5	5	5	5	4	5	5	5	91
#NULL!	#NULL!	#NULL!	#NULL!	#NULL!	#NULL!	#NULL!	#NULL!	#NULL!	#NULL!	#NULL!	#NULL!	#NULL!	#NULL!	#NULL!	#NULL!	#NULL!	#NULL!	#NULL!	#NULL!
