# Supplementary material for: Automated evaluation systems to enhance exam quality and reduce test anxiety
Source: PeerJ Comput Sci. 2025 Feb 25;11:e2666. doi: 10.7717/peerj-cs.2666 (PMC11888855; doi:10.7717/peerj-cs.2666)
Supplement: Supplemental Information 5 [file peerj-cs-11-2666-s005.xlsx]

## Sheet: Sheet1
Question_num	Frequency	strongly_agree	agree	natural	disagree	strongly_disagree	mean	std_deviation	percentage	T_test	sample direction	Question_order
1	N	29	18	0	3	0	4.46	0.788	89.2	13.103	strongly_agree	15
	Percentage	56.9	35.3	0	5.9	0
2	N	27	19	4	0	0	4.46	0.646	89.2	15.992	strongly_agree	16
	Percentage	52.9	37.3	7.8	0	0
3	N	29	17	4	0	0	4.5	0.647	90	16.398	strongly_agree	13
	Percentage	56.9	33.3	7.8	0	0
4	N	72.5	12	0	1	0	4.7	0.58	94	20.715	strongly_agree	7
	Percentage	37	23.5	0	2	0
5	N	46	0	4	0	0	4.84	0.548	96.8	23.738	strongly_agree	2
	Percentage	90.2	0	7.8	0	0
6	N	29	17	4	0	0	4.5	0.647	90	16.398	strongly_agree	14
	Percentage	56.9	33.3	7.8	0	0
7	N	39	0	11	0	0	4.56	0.837	91.2	13.181	strongly_agree	10
	Percentage	76.5	0	21.6	0	0
8	N	39	8	0	3	0	4.66	0.772	93.2	15.2	strongly_agree	8
	Percentage	76.5	15.7	0	5.9	0
9	N	46	1	0	3	0	4.8	0.728	96	17.473	strongly_agree	6
	Percentage	90.2	2	0	5.9	0
10	N	0	46	4	0	0	3.92	0.274	78.4	23.738	agree	18
	Percentage	0	90.2	7.8	0	0
11	N	0	46	4	0	0	3.92	0.274	78.4	23.738	agree	19
	Percentage	0	90.2	7.8	0	0
12	N	46	3	0	1	0	4.88	0.48	97.6	27.707	strongly_agree	1
	Percentage	90.2	5.9	0	2	0
13	N	46	0	4	0	0	4.84	0.548	96.8	23.738	strongly_agree	3
	Percentage	90.2	0	7.8	0	0
14	N	46	0	4	0	0	4.84	0.548	96.8	23.738	strongly_agree	4
	Percentage	90.2	0	7.8	0	0
15	N	46	0	4	0	0	4.84	0.548	96.8	23.738	strongly_agree	5
	Percentage	90.2	0	7.8	0	0
16	N	0	48	0	2	0	3.92	0.396	78.4	16.432	agree	17
	Percentage	0	94.1	0	3.9	0
17	N	30	18	0	2	0	4.52	0.707	90.4	15.206	strongly_agree	11
	Percentage	58.8	35.3	0	3.9	0
18	N	36	10	3	1	0	4.62	0.697	92.4	16.443	strongly_agree	9
	Percentage	70.6	19.6	5.9	2	0
19	N	30	16	4	0	0	4.52	0.646	90.4	16.625	strongly_agree	12
	Percentage	58.8	31.4	7.8	0	0
total							86.3	9.335	90.84	22.193	strongly_agree

## Sheet: Sheet2
mean	std_deviation	percentage	T_test	sample direction	Question_order	Question_norder
4.88	0.48	97.6	27.707	strongly_agree		12
4.84	0.548	96.8	23.738	strongly_agree		5
4.84	0.548	96.8	23.738	strongly_agree		13
4.84	0.548	96.8	23.738	strongly_agree		14
4.84	0.548	96.8	23.738	strongly_agree		15
4.8	0.728	96	17.473	strongly_agree		9
4.7	0.58	94	20.715	strongly_agree		4
4.66	0.772	93.2	15.2	strongly_agree		8
4.62	0.697	92.4	16.443	strongly_agree		18
4.56	0.837	91.2	13.181	strongly_agree		7
4.52	0.707	90.4	15.206	strongly_agree		17
4.52	0.646	90.4	16.625	strongly_agree		19
4.5	0.647	90	16.398	strongly_agree		3
4.5	0.647	90	16.398	strongly_agree		6
4.46	0.788	89.2	13.103	strongly_agree		1
4.46	0.646	89.2	15.992	strongly_agree		2
3.92	0.274	78.4	23.738	agree		10
3.92	0.274	78.4	23.738	agree		11
3.92	0.396	78.4	16.432	agree		16
