# Supplementary material for: Automated evaluation systems to enhance exam quality and reduce test anxiety
Source: PeerJ journal article supplement (doi:10.7717/peerj-cs.2666), 2025-02-25
Supplement: Survey.pdf [file Survey.pdf]

## Evaluate the performance of the proposed system

- Is system usability

- poor
- fair
- good
- very good
- excellent

- Is system effectiveness

- poor
- fair
- good
- very good
- excellent

- Is system short response time

- poor
- fair
- good
- very good
- excellent

- Is system clarity

- poor
- fair
- good
- very good
- excellent

- Is system applicability

- poor
- fair
- good
- very good
- excellent

NOTES: (1= Poor, 2= Fair, 3= Good, 4= Very Good, 5= Excellent)
